1 Title: **dRNA-seq implicates sulfide as master regulator of S(0) metabolism in**  
2 ***Chlorobaculum tepidum* and other green sulfur bacteria**

3 Running Title: **dRNA-seq in *Cba. tepidum***

4 Jacob M. Hilzinger<sup>1,2\*</sup>, Vidhyavathi Raman<sup>1,2\*†</sup>, Kevin E. Shuman<sup>2,3‡</sup>, Brian J. Eddie<sup>1,2§</sup>,  
5 Thomas E. Hanson<sup>1,2,3#</sup>

6

7 1-School of Marine Science and Policy, University of Delaware, Newark, DE U.S.A.

8 2-Delaware Biotechnology Institute, University of Delaware, Newark, DE U.S.A.

9 3-Department of Biological Sciences, University of Delaware, Newark, DE U.S.A.

10

11 \* These authors contributed equally to this work.

12 # Corresponding Author:

13 Address: Rm. 282 DBI, 15 Innovation Way, Newark, DE 19711 U.S.A.

14 Phone: 1-302-831-3404

15 E-mail: [tehanson@udel.edu](mailto:tehanson@udel.edu)

16 †-Current address: Noble Research Institute, 2510 Sam Noble Parkway

17 Ardmore, OK 73401, USA; E-mail: [vraman@noble.org](mailto:vraman@noble.org)

18 ‡-Current address: Wesley College, 120 North State Street, Dover, DE 19901 USA: E-mail:

19 [kevin.shuman2@wesley.edu](mailto:kevin.shuman2@wesley.edu)

20 §-Current address: United States Naval Research Laboratory, 4555 Overlook Ave. SW,

21 Washington, D.C. 20375; E-mail: [Brian.Eddie@nrl.navy.mil](mailto:Brian.Eddie@nrl.navy.mil)

22 Keywords: dRNA-seq, *Chlorobaculum tepidum*, *Chlorobiaceae*, sulfur metabolism, energy  
23 metabolism, transcriptional regulation

24

25 **Abstract**

26       The green sulfur bacteria (*Chlorobiaceae*) are anaerobes that use electrons from reduced  
27 sulfur compounds (sulfide, S(0), and thiosulfate) as electron donors for photoautotrophic growth.  
28 *Chlorobaculum tepidum*, the model system for the *Chlorobiaceae*, both produces and consumes  
29 extracellular S(0) globules depending on the availability of sulfide in the environment. These  
30 physiological changes imply significant changes in gene regulation, which has been observed  
31 when sulfide is added to *Cba. tepidum* growing on thiosulfate. However, the underlying  
32 mechanisms driving these gene expression changes, i.e. specific regulators and promoter  
33 elements involved, have not yet been defined. Here, differential RNA-seq (dRNA-seq) was used  
34 to globally identify transcript start sites (TSS) that were present during growth on sulfide,  
35 biogenic S(0), and thiosulfate as sole electron donors. TSS positions were used in combination  
36 with RNA-seq data from cultures growing on these same electron donors to identify both basal  
37 promoter elements and motifs associated with electron donor dependent transcriptional  
38 regulation. These motifs were conserved across homologous *Chlorobiaceae* promoters. Two  
39 lines of evidence suggest that sulfide mediated repression is the dominant regulatory mode in  
40 *Cba. tepidum*. First, motifs associated with genes regulated by sulfide overlap key basal  
41 promoter elements. Second, deletion of the gene CT1277, encoding a putative regulatory protein,  
42 leads to constitutive over-expression of the sulfide:quinone oxidoreductase CT1087 in the  
43 absence of sulfide. The results suggest that sulfide is the master regulator of sulfur metabolism in  
44 *Cba. tepidum* and the *Chlorobiaceae*. Finally, the identification of basal promoter elements with  
45 differing strengths will further the development of synthetic biology in *Cba. tepidum* and perhaps  
46 other *Chlorobiaceae*.

47

48 **Importance**

49           Elemental sulfur is a key intermediate in biogeochemical sulfur cycling. The  
50 photoautotrophic green sulfur bacterium *Chlorobaculum tepidum* both produces and consumes  
51 elemental sulfur depending on the availability of sulfide in the environment. Our results reveal  
52 transcriptional dynamics of *Chlorobaculum tepidum* on elemental sulfur, and increase our  
53 understanding of the mechanisms of transcriptional regulation governing growth on different  
54 reduced sulfur compounds. This study identifies new genes and sequence motifs that likely play  
55 significant roles in the production and consumption of elemental sulfur. Beyond this focused  
56 impact, this study paves the way for the development of synthetic biology in *Chlorobaculum*  
57 *tepidum* and other *Chlorobiaceae* by providing a comprehensive identification of promoter  
58 elements to control gene expression, a key element of strain engineering.

59

## 60 **Introduction**

61           The green sulfur bacteria (*Chlorobiaceae*) are a family of anaerobic photoautotrophic  
62 sulfur oxidizers. *Chlorobaculum tepidum*, the model system for this family, both produces and  
63 consumes extracellular S(0) globules depending on the availability of sulfide in the environment  
64 (1). Recently, Hanson *et al.* showed that biogenic S(0) globules could serve as the sole  
65 photosynthetic electron donor for growth of *Cba. tepidum*, and that cell-S(0) contact was  
66 required for that growth (2). Expanding upon this work, Marnocha *et al.* showed that cell-S(0)  
67 contact was dynamic, with a large populations of unattached *Cba. tepidum* cells growing at  
68 similar rates to attached cells (3). As polysulfides were detected in supernatants from cultures  
69 producing and consuming S(0), Marnocha *et al.* proposed a model whereby polysulfides act as  
70 soluble intermediates in the formation and degradation of S(0) globules, and could feed  
71 unattached cells (3). These two studies have significantly increased our understanding of how  
72 *Cba. tepidum* interacts with S(0). However many questions remain, particularly how S(0)  
73 metabolism is regulated, and what proteins play a role in cell-S(0) attachment.

74           The analysis of the *Cba. tepidum* genome noted that it encoded few recognizable  
75 transcriptional regulators, leading the authors to conclude that *Cba. tepidum* employs little  
76 transcriptional regulation (4). However, Eddie and Hanson observed a complex transcriptional  
77 response following the addition of sulfide to *Cba. tepidum* growing on thiosulfate (5). The  
78 transcript abundance of a two-gene operon (CT1276-CT1277) was significantly increased in the  
79 presence of sulfide, with CT1277 belonging to the helix-turn-helix xenobiotic response element  
80 family-like protein superfamily, indicating that transcriptional regulators with limited functional  
81 annotation may contribute to gene expression regulation in *Cba. tepidum* (5). While this study  
82 identified numerous transcriptionally regulated genes for the transition from thiosulfate to sulfide

83 as a primary electron donor, the *Cba. tepidum* transcriptome during growth on S(0) as a sole  
84 electron donor has not been documented.

85 Here, RNA-seq and differential RNA-seq (dRNA-seq) were used to characterize the  
86 transcriptome of *Cba. tepidum* growing on biogenic S(0) and to globally identify transcript start  
87 sites (TSS) active during growth on sulfide, biogenic S(0), and thiosulfate as sole electron  
88 donors, respectively. RNA-seq data suggest that the most dynamic changes in transcript  
89 abundance occur in response to sulfide, and that the majority of genes differentially expressed in  
90 response to sulfide are downregulated. TSS positions were used to identify putative promoter  
91 elements, and, in combination with RNA-seq data, were used to identify DNA motifs that were  
92 conserved across homologous *Chlorobiaceae* promoters. The position of the discovered motifs  
93 relative to TSS and basal promoter elements suggests that repression is the dominant mode of  
94 transcriptional regulation for genes involved in sulfur metabolism in agreement with the RNA-  
95 seq data. In support of this observation, deletion of CT1277 from the *Cba. tepidum* genome led  
96 to overexpression of the sulfide:quinone oxidoreductase (SQR) CT1087 during growth on  
97 thiosulfate, suggesting that the CT1277 gene product acts as a repressor.

98

## 99 **Results**

100 **The transcriptome of *Cba. tepidum* grown with S(0) as the sole electron donor.** RNA-seq  
101 analysis of transcriptomes in *Cba. tepidum* cultures growing on thiosulfate and biogenic S(0)  
102 revealed similar expression profiles for growth on both substrates. 28,183,709 reads were  
103 uniquely aligned to the genome for the thiosulfate library, while the S(0) library had 37,350,690  
104 uniquely aligned reads. Despite the tight correlation of expression between thiosulfate and S(0),  
105 120 genes were differentially expressed, with 55 genes being downregulated on S(0) relative to

106 thiosulfate, and 65 genes being upregulated on S(0) (Table S1). Comparing the S(0)  
107 transcriptome with the previously published sulfide transcriptome (5) identified 106  
108 differentially expressed genes, with 35 genes upregulated on sulfide relative to S(0), and 71  
109 genes being downregulated on sulfide (Table S1).

110 The magnitude of transcript abundance changes was examined in detail across the  
111 substrates. Log<sub>2</sub> fold-change values for genes with increased expression on sulfide relative to  
112 thiosulfate and S(0) (15.2 and 15.7, respectively) were both much larger than that of S(0) relative  
113 to thiosulfate (5.74). Similarly, the fold-change values for genes with decreased expression on  
114 sulfide relative to thiosulfate and S(0) were considerably lower than that of S(0) relative to  
115 thiosulfate (-9.31 and -9.85 versus -2.30). This suggests that the most dynamic changes in  
116 transcript abundance occur in response to sulfide. These changes are clearly observed in genes  
117 encoding key components of *Cba. tepidum*'s sulfur oxidation machinery. For example, the Sox  
118 and Dsr genes were strongly downregulated on sulfide (5), but were not differentially expressed  
119 between growth on S(0) and thiosulfate (Table S1).

120

121 **Global identification of TSSs and basal promoter elements in *Cba. tepidum*.** The dRNA-seq  
122 protocol used in this study produced 6.1-17 million reads per replicate (Table S2) with 2.0-6.7  
123 million reads uniquely aligned to the genome for each replicate. Analysis of these data identified  
124 a total of 3426 putative TSS across growth on three electron donors in *Cba. tepidum*: 1086  
125 primary TSS (pTSS), 393 secondary TSS (sTSS), 583 antisense TSS (asTSS), 2100 internal TSS  
126 (iTSS), and 71 orphan TSS (oTSS) (Fig. 1A; Table S3). Four transcript start sites previously  
127 identified by primer-extension analysis (*csmB*, *csmC*, *csmE*, and *sigA*) were captured in these  
128 data (6). Additionally, a TSS was identified that corroborates the *csmI* promoter inferred by

129 Gruber and Bryant (6). Although the absolute number of putative TSS for each condition was  
130 similar (2458 for sulfide, 2303 for S(0), and 2477 for thiosulfate), there were condition-specific  
131 differences between predicted TSS (Fig. 1B). However, there was little correlation between  
132 condition-dependent TSS and changes in transcript abundance. A total of 1417 of the predicted  
133 TSS were found in all three conditions: 718 pTSS, 102 sTSS, 613 iTSS, 338 asTSS, and 33  
134 oTSS.

135 Two motifs were identified when 50 bp upstream of all TSS were analyzed by the  
136 MEME software package (Fig. 1C,D; 7). The most abundant motif (Fig. 1C) closely resembles  
137 consensus RpoD binding sequences, with the highest similarity to those of the *Bacteroidetes*,  
138 specifically *Flavobacterium* spp. (TTG-N<sub>17-23</sub>-TANNTTGG; 8). This would be expected as  
139 RpoD protein sequences from *Bacteroidetes* and *Cba. tepidum* clade together, and away from  
140 other RpoD proteins (9). However, the -7 consensus sequence, TA[ATC][ATC][AT]T, is  
141 different than those of other published RpoD consensus binding sites (8), making the *Cba.*  
142 *tepidum* RpoD consensus binding sequence unique to published consensus sequences to date.  
143 The RpoD motif was associated with 1227 TSS (36% of all TSS), and 64% of pTSS. Together,  
144 this suggests that the primary sigma factor of *Cba. tepidum* is RpoD encoded by CT1551 (*sigA*).

145 The second motif (Fig. 1D) resembles  $\sigma^{70}$  ECF subfamily binding sequences, with the  
146 distinct AAC motif in the -35 consensus region (10). This motif closely resembles the promoter  
147 consensus sequences of  $\sigma^E$  (GG[AG][AC]C-N<sub>18</sub>-[CG]GTTg) and  $\sigma^H$  ([CG]GGAAC-N<sub>17</sub>-  
148 [CG]GTT[CG]) from *Mycobacterium tuberculosis* (11, 12), and that of  $\sigma^R$  (GGAAT-N<sub>18</sub>-GTT)  
149 from *Streptomyces coelicolor* (13). As the *Cba. tepidum* genome encodes three  $\sigma^{70}$  ECF factors  
150 (CT0278, CT0502, CT0648), this motif may represent a consensus motif that all three ECF  
151 factors bind to, or it may represent the consensus sequence of a number of highly similar, yet

152 distinct, motifs that bind each ECF factor with different affinities. For example,  $\sigma^X$  and  $\sigma^W$   
153 promoter sequences of *Bacillus subtilis* are highly similar, with some promoters binding both  
154 proteins, while others bind one, but not the other (14). Thus, this motif likely binds one or more  
155 ECF factors in *Cba. tepidum*. This ECF-like motif was associated with 182 TSS (5.3% of all  
156 TSS), and 7.9% of pTSS.

157         Aside from RpoD and the three ECF sigma factors, *Cba. tepidum* encodes one additional  
158 sigma factor, CT1193 (*rpoN*), a  $\sigma^{54}$  factor that controls expression of nitrogen regulated genes,  
159 including the *nif* operon that encodes proteins for N<sub>2</sub> fixation in diverse bacteria. Phylogenetic  
160 footprinting of the *nifH* promoter across the *Chlorobiaceae* identified RpoN and NtrC binding  
161 motifs (data not shown; 32, 33). Using the FIMO search tool (15) in the MEME suite with the  
162 RpoN motif as a query returned one additional pTSS with a q-value <0.05 preceding gene  
163 CT0644, which encodes an HSP20 family protein.

164

165 **Putative sulfide operator sequence 1 (PSOS-1) is associated with *sqr* and putative**  
166 **regulatory genes.** *Cba. tepidum* displays a robust transcriptional response depending on the  
167 reduced sulfur compound utilized for growth. Binning genes by expression pattern, e.g. all genes  
168 with increased transcript abundance on sulfide relative to thiosulfate, and then analyzing regions  
169 upstream of the associated pTSS did not produce any significant motifs associated with the  
170 promoter regions (data not shown). Therefore, we turned to conservation across *Chlorobiaceae*  
171 genomes, i.e. phylogenetic footprinting, to identify putative regulatory motifs associated with  
172 sulfur regulated genes that are shared between *Cba. tepidum* and other *Chlorobiaceae*.

173         Phylogenetic footprinting identified an unknown motif (putative sulfide operator  
174 sequence 1; PSOS-1) in the promoter of CT1277 (Fig. 2A), a putative transcriptional regulator



175 that was highly upregulated on sulfide compared to thiosulfate (5) and S(0) (Fig. 2). PSOS-1 was  
176 found associated with the pTSS for the two bona fide SQRs CT0117 and CT1087 via FIMO  
177 searches (15). Phylogenetic footprinting recovered PSOS-1 motifs associated with *sqr* genes that  
178 encode sulfide:quinone oxidoreductase across the *Chlorobiaceae*, including all CT1087  
179 homologues (Fig. 2B), and a subset of CT0117 homologues (Fig. 2C). A consensus motif for  
180 *Cba. tepidum* PSOS-1 sites was constructed from CT1277, CT0117, and CT1087 sites (Fig. 2E),  
181 and used as the seed in a FIMO search against the *Cba. tepidum* genome. In addition to returning  
182 the input loci, PSOS-1 was predicted to occur near 156 TSS. The only other TSS with a q-value  
183 < 0.05 was a pTSS for CT0742 (Fig. 2D), a putative transmembrane protein in the TauE-like  
184 family of anion transporters. In *Neptuniibacter caesariensis*, TauE has been proposed as a sulfite  
185 transporter (16). Based on our TSS data, it appears that CT0743 is co-transcribed with CT0742.  
186 The CT0743 gene product is a hypothetical protein containing a domain of unknown function.

187 In *Cba. tepidum*, the putative regulator CT1277 appears to be expressed from an RpoD  
188 pTSS (Fig. 2A). In the CT1277 promoter, the PSOS-1 motif overlapped the +1 site, and the first  
189 two base pairs of the -6 box. The positioning of PSOS-1 relative to the -6 box was conserved for  
190 all genomes analyzed except *Chlorobium phaeobacteroides* BS1, where it was found largely in  
191 the spacer sequences between the -6 and -33 boxes, with partial overlap of the -6 box (Fig. 2A).  
192 In *Chlorobium chlorochromatii*, the PSOS-1 motif was discovered in the promoter of Cag\_0887,  
193 a hypothetical protein upstream of the CT1277 homologue Cag\_0886; Cag\_0887-Cag\_0885 are  
194 likely transcribed as a single unit. The CT1087 and CT0117 PSOS-1 motifs were positioned near  
195 the pTSS for each gene (Fig. 2B,C). The positioning of PSOS-1 within homologous CT1087  
196 promoters was variable, with PSOS-1 overlapping the -33 box of two promoters, and the -6 box  
197 of the other two. PSOS-1 overlapped the -6 box and extended upstream into the spacer sequence

198 of the six homologous CT0117 promoters. However in the *Chloroherpeton thalassium* promoter,  
199 PSOS-1 overlapped the -6 box, and extended downstream, and in the *Chlorobium limicola*  
200 promoter, it overlapped the -33 box. Given that the PSOS-1 motif overlaps the RpoD binding  
201 motif, the +1 site, or both, suggests that this motif binds a negative repressor, as occlusion of the  
202 RpoD binding site, or +1 site, would likely interfere with transcription initiation. The PSOS-1  
203 sequence appears to be unique in that it does not match with any characterized motifs present in  
204 the CollecTF, Prodoric, and RegTransBase databases (17).

205 Expression of the components of the PSOS-1 regulon were variable between growth on  
206 sulfide and S(0) (Fig. 2F). CT1277 and CT1087 were both significantly upregulated on sulfide  
207 relative to thiosulfate and S(0), while CT0117 was downregulated on both electron donors  
208 relative to sulfide (Fig. 2F; 5). CT0742-CT0743 did not change in expression significantly  
209 between growth conditions, and displayed a similar expression profile to ribosomal genes.

210

211 **PSOS-2 is associated with *sox*, *dsr*, and CT2230 TSS.** As many genes related to thiosulfate and  
212 S(0) oxidation were found to be downregulated on sulfide relative to S(0) and thiosulfate (Fig. 3;  
213 5), we searched the promoters of genes downregulated on sulfide for putative regulatory motifs.  
214 Only one RpoD TSS was observed in the *sox* operon immediately adjacent to *soxJ* (CT1015),  
215 supporting the assertion that the *sox* operon is transcribed as a single unit (18). Therefore,  
216 sequences upstream of the start codon of the first gene in the *sox* operon across the  
217 *Chlorobiaceae* were analyzed for motif discovery. Phylogenetic footprinting identified an  
218 unknown motif (putative sulfur operator sequence 2; PSOS-2) in the promoters analyzed (Fig.  
219 3A). The *sox* PSOS-2 motif was searched against the *Cba. tepidum* genome. The top two  
220 positions occurring near TSS, excluding the pTSS for *soxJ*, were pTSS for *dsrC-1* (CT0851) and

221 CT2231. Phylogenetic footprinting of *dsrC-1*, *dsrC-2* (CT2250), and orthologs across the  
222 *Chlorobiaceae* returned PSOS-2 sites in all *dsrC* promoters across the *Chlorobiaceae* (Fig. 3B).  
223 CT2231, a hypothetical protein with no apparent homologues, appears to be co-transcribed with  
224 CT2230, a putative outer membrane protein. As no TSS were found between these two genes,  
225 and as both are downregulated on sulfide relative to thiosulfate and S(0) (Fig. 3; 5), sequences  
226 upstream of CT2230 homologues across the *Chlorobiaceae* and the CT2231 promoter were  
227 analyzed for motif discovery. PSOS-2 sites were found in all promoters (Fig. 3C). A consensus  
228 motif for PSOS-2 was constructed from *soxJ*, *dsrC-1*, *dsrC-2*, and CT2231 sites (Fig. 3E). In  
229 addition to returning the input loci, PSOS-2 was predicted to occur near 184 additional TSS. The  
230 only TSS with a q-value < 0.05 was the pTSS for CT1072 (*dsbE*; Fig. 3D), and an aTSS for  
231 CT1231, a transposase annotated as having an internal deletion (data not shown).

232 In *Cba. tepidum*, PSOS-2 was found to overlap the +1 site of the pTSS of *soxJ*, and the -6  
233 box of the RpoD motif predicted using the bulk TSS data (Fig. 3A). The positioning of PSOS-2  
234 across *sox* promoters of the *Chlorobiaceae* was highly conserved, with all PSOS-2 sites found to  
235 overlap the -6 box, and extend downstream. PSOS-2 overlapped both +1 sites of *dsrC-1* and  
236 *dsrC-2*, and partially overlapped the -6 box of the RpoD motif (Fig. 3B). The position of PSOS-2  
237 was variable across *dsrC* promoters, yet at least partially overlapped the -6 box in all promoters  
238 except that of *Chl. phaeobacteroides*, where it was found 6 bp downstream of the -6 box. PSOS-  
239 2 was found to overlap the +1 site of CT2231, and the last bp of the -6 RpoD box (Fig. 3C).  
240 Positioning of PSOS-2 was fairly conserved across CT2230 promoters, with all but one site at  
241 least partially overlapping the -6 box. The PSOS-2 site in the CT1072 promoter overlapped the -  
242 6 box, and part of the RpoD spacer sequence (Fig. 3D). The PSOS-2 sequence appears to be

243 unique in that it does not match with any characterized motifs present in the CollecTF, Prodigic,  
244 and RegTransBase databases (data not shown; 17).

245 The components of the PSOS-2 regulon were downregulated on sulfide relative to S(0)  
246 (Fig. 3F). The *sox* operon, CT2231-CT2230, *dsbE*, *dsrCIA1*, and *dsrC2* are significantly  
247 downregulated on sulfide relative to S(0) and thiosulfate (Table S1; 5). The first *dsr* cluster,  
248 *dsrCABLEFH* (CT0851-CT0857), appears to be a single transcriptional unit under the control of  
249 the *dsrC1* RpoD pTSS. The second *dsr* cluster, *dsrNCABLUEFHTMKJOPVW* (CT2251-  
250 CT2238), appears to be broken up into three transcriptional units: *dsrN*, *dsrC2-P*, and *dsrVW*.  
251 *dsrN* and *dsrC2-P* appear to be controlled by independent RpoD pTSS, while *dsrVW* appears to  
252 be controlled by an ECF factor pTSS (Table S3). This may explain why *dsrVW* is upregulated on  
253 sulfide relative to thiosulfate and S(0), while the rest of the cluster is downregulated on sulfide  
254 relative to thiosulfate and S(0) (Fig. 3F; Table S1; 5).

255  
256 **A CRP-like motif (CLM) is associated with *psrABC*, *cydAB* and CT0729.** The putative  
257 polysulfide oxidoreductase complex, *psrABC* (CT0496-CT0494), is significantly upregulated on  
258 sulfide compared to S(0) and thiosulfate (Fig. 4; 5). Phylogenetic footprinting identified two  
259 occurrences of a small motif (CRP-like motif; CLM) upstream of the RpoD binding site in the  
260 *Cba. tepidum* and *Cba. parvum* promoters (Fig. 4A). The *psrABC* CLM was searched against the  
261 *Cba. tepidum* genome for positions that occurred within 200 bp upstream or 50 bp downstream  
262 of a TSS. Aside from returning the two *psrABC* sites, FIMO returned positions near the pTSS for  
263 CT1818 and CT0729 as the only positions with q-values < 0.05. CT1818-CT1819 encode  
264 *cydAB*, a terminal oxidase cytochrome *bd* complex that confers sulfide-resistant O<sub>2</sub>-dependent  
265 respiration in *E. coli* (19). CT0729 is a Nudix hydrolase domain protein. A consensus motif was

266 generated from the *psrABC*, *cydAB*, and CT0729 sites, and was used to search against the *Cba.*  
267 *tepidum* genome (Fig. 4C). Significant positions (q-value <0.05) included pTSS for CT1089 and  
268 CT1061, and an oTSS at position 503855 (Fig. 4B). CT1089-CT1088 encode for the two  
269 subunits of ATP:citrate lyase. CT1061 is a hypothetical protein with a predicted steriodogenic  
270 acute regulatory protein-related lipid transfer (START) domain found in polyketide cyclases and  
271 dehydrogenases. The sequence downstream of the oTSS was searched for open reading frames,  
272 and RNA families (20), but nothing of significance was found.

273 In *psrABC* promoters of *Cba. tepidum* and *Cba. parvum*, the first CLM site occurred 49  
274 bp upstream of the RpoD -6 box, while the second site occurred 114 bp upstream of the *Cba.*  
275 *tepidum* -6 box, and 113 bp upstream of the *Cba. parvum* -6 box (Fig. 4A). In *Cba. tepidum*, the  
276 RpoD -6 box occurs 4 bp upstream of the +1 site. The CLM site for *cydAB* occurred 57 bp  
277 upstream of the TSS, in a similar position to the first *psrABC* site that occurred 58 bp upstream  
278 of the *psrABC* TSS (Fig. 4B). The CLM site for CT1089 occurred 35 bp upstream of the TSS,  
279 and 4 bp upstream of the -33 box, while both the CT1061 and orphan sites overlapped the RpoD  
280 spacer sequence and -6 box. The CT0729 CLM site occurred 10 bp downstream of the CT0729  
281 TSS.

282 The CLM motif resembles the CRP (TGTGA-N<sub>6</sub>-TCACA) and FNR (TTGAT-N<sub>4</sub>-  
283 ATCAA) consensus binding motifs of *E. coli* (21, 22) without the spacer sequence. The spacing  
284 of the motif sites (Fig. 5A) echoes CRP-activating promoters in *E. coli* with multiple CRP  
285 binding sites upstream of the RpoD binding site (21). In support of this, TOMTOM (17) matched  
286 the CLM consensus to the PrfA consensus motif from *Listeria monocytogenes*, a CRP-domain  
287 transcriptional regulator. The PrfA consensus, WTAACAWWTGTTAA (23), does not contain  
288 the N<sub>4-6</sub> spacer present in *E. coli* CRP/FNR domain binding sites, adding further support that the

289 *Cba. tepidum* CLM may bind a CRP domain protein. *Cba. tepidum* encodes a single CRP/FNR  
290 domain protein, CT1719. However, no CRP/FNR domain protein was found in *Cba. parvum*, or  
291 any other *Chlorobiaceae* genome examined.

292 While the components of the CLM regulon have variable expression on S(0) relative to  
293 thiosulfate and sulfide, the direction of expression on S(0) relative to sulfide and thiosulfate is  
294 similar for each component; *psrABC* and *cydAB* are both significantly downregulated on S(0)  
295 relative to thiosulfate and sulfide, while CT1061 and CT0729 are upregulated on S(0) relative to  
296 thiosulfate and sulfide (Fig. 4D). CT1089-CT1088 is not differentially expressed between  
297 growth conditions.

298

299 **CT1277 encodes a transcriptional repressor of CT1087.** Previous data showed that the  
300 CT1276-CT1277 cassette displayed increased transcript abundance in cells following sulfide  
301 addition after growth on thiosulfate (5). Given that CT1277 belongs to the HTH-XRE family of  
302 transcriptional regulators, the CT1277 gene was deleted from the *Cba. tepidum* genome to assess  
303 its role in sulfide dependent gene regulation. Expression of CT1087 was monitored by q-RT-  
304 PCR in the wild-type and two independently isolated  $\Delta$ CT1277 strains (Fig. 5). CT1087  
305 transcript abundance was significantly elevated (3.5-fold,  $p < 0.03$ ) in both  $\Delta$ CT1277 strains  
306 compared to the wild type during growth on thiosulfate. Transition to growth on sulfide from  
307 thiosulfate resulted in a 1.9-fold increase ( $p = 0.04$ ) in CT1087 transcript abundance in the wild  
308 type strain, confirming that its expression is sulfide dependent as previously reported (5, 24).  
309 Post-sulfide addition, CT1087 displayed a 16.3-fold ( $p = 0.003$ ) and 4.6-fold ( $p < 0.001$ ) increase  
310 in transcript abundance relative to the wild type in  $\Delta$ CT1277.6 and  $\Delta$ CT1277.11, respectively.  
311 Thus, CT1087 expression was much more strongly induced (9.7-fold;  $p = 0.003$ ) in the absence

312 of CT1277. Increased expression of CT1087 after sulfide addition in the  $\Delta$ CT1277 strains  
313 suggests the presence of a sulfide-dependent activator. Sequences up to 2000 bp upstream of the  
314 CT1087, CT1277, and CT0117 promoters were analyzed for motif discovery, but no candidate  
315 activator motif was found. Altered expression of CT1087 in the  $\Delta$ CT1277 strains indicates that  
316 CT1277 negatively regulates the transcription of CT1087 in the presence of an activator. No  
317 significant growth phenotype was observed for the  $\Delta$ CT1277 strain compared to the wild-type  
318 strain (data not shown).

319

## 320 **Discussion**

321 In this study, we provide the first global transcript abundance data for *Cba. tepidum*  
322 during growth on S(0) as the sole electron donor, and use this data to identify genes that were  
323 differentially expressed between growth on sulfide and S(0). Many of these genes encode key  
324 components of *Cba. tepidum*'s sulfur oxidation machinery. The most dynamic changes in gene  
325 expression between growth on different reduced sulfur compounds were in response to sulfide.  
326 We also provide the first global transcript start site map for *Cba. tepidum*. dRNA-seq identified  
327 3426 putative TSS across growth on sulfide, thiosulfate, and S(0), of which 1086 were primary  
328 TSS. This data also includes 71 orphan TSS that may control transcription of functional elements  
329 that were missed during genome annotation, and encompasses the first evidence of widespread  
330 antisense transcription in *Cba. tepidum*. Two basal promoter motifs were identified: an RpoD  
331 and an ECF sigma factor motif. Three putative regulatory motifs were discovered by  
332 phylogenetic footprint analysis of orthologous promoters across the *Chlorobiaceae* for genes that  
333 were differentially expressed between growth on reduced sulfur compounds in *Cba. tepidum*.  
334 Together, the data presented in this study provides the first predictions for a mechanistic



335 understanding of transcriptional regulation between sulfur-dependent growth states in *Cba.*  
336 *tepidum*, and the *Chlorobiaceae* as a whole.

337 TSS that are not associated with the RpoD or ECF factor motifs may not bind  $\sigma$  factors,  
338 and therefore may not be *bona fide* TSS. In support of this, sequences (+/- 50 bp) surrounding  
339 TSS associated with  $\sigma$  factor motifs have significantly higher AT content than those sequences  
340 surrounding TSS without  $\sigma$  factor motifs (data not shown). Alternatively, these TSS may be  
341 associated with divergent  $\sigma$  factor binding sites that are not represented by the motifs discovered  
342 in this study (Fig. 1). Of the 2049 TSS that do not have  $\sigma$  factor motifs, 1733 (84.6%) are iTSS  
343 and 319 (15.6%) are pTSS, whereas of the 1377 TSS with  $\sigma$  factor motifs, 367 (26.7%) are iTSS  
344 and 767 (55.7%) are pTSS. iTSS are enriched in TSS with no associated  $\sigma$  factor motif,  
345 suggesting that most iTSS in this study are not *bona fide* TSS. This is in contrast to a recent  
346 study in *E. coli* that found most iTSS were associated with  $\sigma$  factor motifs (27). Indeed, the  
347 fraction of iTSS detected in this study, 61% of all TSS, is higher than in other organisms: 37% in  
348 *Escherichia coli*, 36% in *Campylobacter jejuni*, and 18% in *Helicobacter pylori* (27, 28, 32).  
349 pTSS and sTSS occur at similar percentages across these organisms, while *Cba. tepidum* has  
350 fewer asTSS, 17%, than others: 43% in *E. coli*, 48% in *C. jejuni*, and 41% in *H. pylori*. These  
351 variations may reflect differences in how more closely related organisms in the *Gamma*- and  
352 *Epsilon*-proteobacteria regulate transcription relative to the *Chlorobiaceae*. Future experiments  
353 will determine if the high percentage of iTSS in *Cba. tepidum* is characteristic of all  
354 *Chlorobiaceae* and if there is any transcriptional activity associated with iTSS associated  
355 sequences that lack a recognizable sigma factor motif in *Cba. tepidum*.

356



357 A putative operator sequence, PSOS-1, was discovered in the promoters of the two SQRs  
358 CT0117 and CT1087, as well as in the promoters of the putative regulatory protein CT1277 and  
359 the TauE-domain protein CT0742 (Fig. 2). While CT1087 and CT1277 are highly upregulated  
360 on sulfide relative to S(0) (Fig. 2) and thiosulfate (5), CT0117 is downregulated, and CT0742-  
361 CT0743 are not differentially expressed. The sulfide versus S(0) expression data corroborates  
362 previous studies that have observed downregulation of CT0117, and upregulation of CT1087 and  
363 CT1277 in response to high sulfide (5, 24). CT1277 was shown to negatively regulate CT1087  
364 expression (Fig. 5). Therefore, PSOS-1 may represent the CT1277 binding motif, which would  
365 suggest that CT1277 is subject to auto-repression. If PSOS-1 binds CT1277, and functions as an  
366 operator sequence, then promoters associated with PSOS-1 should be downregulated in response  
367 to sulfide; this is the case for CT0117 (Fig. 2). However CT1087 expression increased in  
368 response to sulfide in the  $\Delta$ CT1277 background, suggesting the presence of a sulfide-dependent  
369 activator (Fig. 5). As CT1277 is associated with PSOS-1, and shares a similar expression profile  
370 to CT1087, then it suggests that the activator acting on CT1087 also activates CT1277. Thus,  
371 whatever element activates CT1087 and CT1277 expression should be absent from the CT0117  
372 promoter. This leads to a model whereby sulfide activates the PSOS-1-binding protein (CT1277)  
373 and a sulfide-dependent activator (Fig. 6). CT1277 represses transcription of CT0117, CT1087,  
374 and CT1277, while the sulfide-dependent activator activates transcription of CT1087 and  
375 CT1277, but not that of CT0117. This may be to fine tune expression of CT1277 and CT1087.

376 For several of the key components of sulfide oxidation that are downregulated in  
377 response to sulfide, a putative operator sequence, PSOS-2, was discovered overlapping the TSS  
378 and/or the RpoD -6 box (Fig. 3). The positioning of this motif, and the expression patterns of the  
379 associated transcriptional units, strongly suggest that this motif functions as an operator

380 sequence. As these genes are downregulated in response to sulfide relative to thiosulfate (5), and  
381 appear to also be downregulated in response to sulfide on S(0) (Fig. 3), PSOS-2 may bind a  
382 sulfide-dependent repressor (Fig. 6). CT2230 is predicted to be a membrane transporter in the  
383 FadL family of outer membrane proteins, and has been characterized in long chain fatty acid  
384 transport in *E. coli* (30). As CT2230 is involved in the transport of hydrophobic molecules, and  
385 is predicted to be part of a sulfide-repressed regulon, it may be involved in transport of  
386 hydrophobic sulfur chains across the outer membrane.

387         The *psrABC* promoter was found to contain two CLM sites, with single CLM sites  
388 occurring near the TSS of *cydAB*, CT1089-CT1088, CT1061, and CT0729 (Fig. 4). In *E. coli*,  
389 CRP can function as both a repressor or activator depending on positioning relative to the TSS  
390 and sigma factor binding site (21). Both *psrABC* and *cydAB* displayed similar expression profiles  
391 in that they were downregulated on S(0) relative to thiosulfate and sulfide (Fig. 4D). However,  
392 CT1089-CT1088 did not change significantly in expression between growth conditions, and  
393 CT1061 and CT0729 are both upregulated on S(0) relative to sulfide. These expression patterns  
394 can be explained if the location of the CLM site is taken into account (Fig. 4A,B), and if S(0)  
395 inhibits the activity of the CLM-binding protein. For *psrABC* and *cydAB*, the CLM sequence  
396 likely functions as an activator, while for CT1061, the  $\sigma$ TSS, and CT0729 it likely functions as a  
397 repressor in that it interferes with sigma factor binding or transcription elongation. The CLM site  
398 may not have a large effect on CT1089-CT1088, and could function as either repressor, or  
399 activator (21). Thus, if S(0) inhibits the function of the CLM, it would repress *psrABC* and  
400 *cydAB*, while activating CT1061 and CT0729 (Fig. 6).

401         Between the transcript abundance data (this study; 5), and the three putative regulatory  
402 motifs discovered in sulfur-regulated genes, it appears that sulfide likely acts as a master

403 regulator, activating proteins that bind PSOS-1, where CT1277 is the most likely candidate  
404 binding protein, PSOS-2, and the inferred, but unidentified, sulfide-dependent activator acting on  
405 CT1087 (Fig. 6). If S(0) inhibits the activity of the CLM binding protein, where CT1719 is the  
406 most likely candidate binding protein, then the expression pattern of CLM-associated genes can  
407 be explained. As the three motifs identified here were found to be conserved between multiple  
408 *Chlorobiaceae* genomes, it suggests that the regulatory functions carried out by these motifs are  
409 conserved across genomes. Thus, we have identified genes important for growth on S(0) relative  
410 to sulfide and thiosulfate, globally mapped TSS that were active during growth on these electron  
411 donors, identified basal promoter motifs, and discovered putative sulfur regulatory motifs. From  
412 this data, a model has emerged whereby sulfide is a master regulator of *Cba. tepidum*'s  
413 metabolic state, inducing the repression of genes important for thiosulfate and S(0) oxidation,  
414 and the activation of several key components for sulfide oxidation.

415

## 416 **Methods and Materials**

417 **RNA sequencing.** Cultures were grown at 20  $\mu\text{mol photon m}^{-2} \text{s}^{-1}$  PAR in Pf-7 medium (24) at  
418 47°C with thiosulfate as the sole electron donor, or at 42°C with biogenic S(0) as the sole  
419 electron donor. RNA was extracted using the NucleoSpin RNA kit (Machery-Nagel), rRNA was  
420 depleted using the MicroExpress kit (Ambion), and treated with the TURBO DNA-free kit  
421 (Ambion) to remove residual genomic DNA. RNA-seq libraries were constructed using the  
422 NuGEN Ovation kit (NuGEN) to convert 25 ng RNA to double stranded cDNA, with subsequent  
423 fragmentation to approximately 100 bp fragments using an S2 Adaptive Focused Acoustic  
424 Disruptor (Covaris). Fragment size was confirmed by agarose gel electrophoresis on a 2% gel.  
425 The NuGEN Encore kit (NuGEN) was used to ligate adapters suitable for Illumina sequencing to

426 the ends of these fragments. Libraries were sequenced on an Illumina HiSeq 1000 at the  
427 University of Delaware Sequencing and Genotyping Center.

428

429 **RNA-seq analysis.** Reads were aligned to the *Cba. tepidum* genome using the Eland pipeline  
430 (Illumina). Custom Perl scripts (available upon request) were used to calculate the number of  
431 sequences that mapped to each annotated gene, non-coding RNA, and intergenic region of more  
432 than 50 bp, correcting for the length of the region. Data were normalized using quantile  
433 normalization as previously described (5). Differential expression between each pair of libraries  
434 was calculated using DESeq (30).

435 We previously reported the transcriptional response of *Cba. tepidum* to sulfide addition  
436 after growth on thiosulfate (5). The sulfide and S(0) expression libraries were constructed with  
437 different kits, and sequenced at different times, so in order to compare expression of *Cba.*  
438 *tepidum* on S(0) to that on sulfide, fold changes on S(0) relative to thiosulfate were divided by  
439 fold changes on sulfide relative to thiosulfate, giving a fold change value for each gene on  
440 sulfide relative to S(0). JMP® Pro (version 12.1.0) was used to create a box-and-whisker plot for  
441 the distribution of the fold change of sulfide relative S(0). Outliers, or those points outside of 1.5  
442 × the interquartile range from the mean, were called as differentially expressed genes (Table S1).

443

444 **Differential RNA sequencing.** dRNA-seq libraries were constructed from four independent  
445 cultures grown on thiosulfate, biogenic S(0), and from those grown on thiosulfate, spiked with  
446 1.6 mM sulfide, and harvested 30 minutes after sulfide addition. *Cba. tepidum* cultures were  
447 grown as described by Levy, Lee, and Hanson at 20  $\mu\text{mol photon m}^{-2} \text{ s}^{-1}$  PAR (32). Replicate 1.5  
448 ml cell pellets were harvested by centrifugation after 20 hours of growth (mid-log phase). Cell

449 pellets were flash frozen in liquid nitrogen, and stored at -70°C. Cell pellets were thawed on ice,  
450 resuspended in 100 µl TE buffer (pH 8.0) with 1 µl Ready-Lyse Lysozyme (20 KU/µl;  
451 Epicentre), and incubated at room temperature for 30 min. Two replicate cell pellets were  
452 combined and RNA was purified by the NucleoSpin RNA kit (Macherey-Nagel). 10 µg RNA  
453 was treated with the TURBO DNA-free Kit (ThermoFisher) for gDNA removal, and then  
454 concentrated over RNA Clean & Concentrator-25 columns (Zymo Research). rRNA was  
455 depleted via the MicroExpress kit (Ambion), and samples were concentrated over Zymo-25  
456 columns. Libraries were normalized by *sigA* copy number (5) prior to terminator 5' phosphate-  
457 dependent exonuclease (TEX; Epicentre) treatment. Each replicate was split into two samples for  
458 TEX treatment: the first was treated with 1 U TEX in a 20 µl reaction, while the second was  
459 incubated in the same buffer without TEX (33). Reactions were cleaned over RNA Clean &  
460 Concentrator-5 columns (Zymo Research). Samples were subsequently treated with 2 Units  
461 tobacco acid pyrophosphatase (TAP; Epicentre) in 50 µl total reaction volume followed by RNA  
462 concentration on Zymo-5 columns. 5' adapters from the NEBNext Multiplex Small RNA Library  
463 Prep Set for Illumina kit (NEB) were ligated to the treated RNA samples using 2.5 µl Ligation  
464 Enzyme Mix in 20 µl total reaction volume with final concentrations of 1 mM ATP and 12.5%  
465 PEG8000. RNA was subsequently fragmented for 2 min using the NEBNext Magnesium RNA  
466 Fragmentation Module (NEB), and cleaned using Agencourt RNAClean XP beads (Beckman  
467 Coulter). 3' ends were repaired via calf intestinal alkaline phosphatase (NEB) treatment, and  
468 cleaned over Zymo-5 columns. 3' adapter ligation, first strand synthesis with indexed primers,  
469 and cDNA amplification (15 cycles) were completed using the NEBNext Small RNA kit. cDNA  
470 reactions were purified via Agencourt AMPure XP beads (Beckman Coulter). BluePippin was  
471 used for size selection (150-600 bp) prior to Illumina sequencing over two lanes (12 libraries

472 pooled per lane) on a HiSeq 2000 at the University of Delaware Sequencing and Genotyping  
473 Center.

474

475 **dRNA-seq analysis.** The RNA-seq analysis pipeline READemption (version 0.3.9) was used to  
476 align reads to the *Cba. tepidum* genome, and the output was passed to TSSpredator (version  
477 1.06) for TSS identification (28, 33). In order for a TSS to be called as active under a specific  
478 condition, it needed to be detected in at least three of four replicates with an enrichment score of  
479  $\geq 2$ , and meet the remaining parameters specified under the *very specific* setting. TSS were  
480 classified according to the definitions of Sharma *et al.* (33). Primary TSS (pTSS) are defined as a  
481 TSS within 300 bp upstream of an annotated gene. If multiple TSS are present in this range, the  
482 pTSS is that with the highest enrichment value, and the others are secondary TSS (sTSS) sites.  
483 Antisense TSS (asTSS) occur on the antisense strand internal to or within 100 bp downstream of  
484 an annotated feature. Internal TSS (iTSS) occur on the sense strand within an annotated gene.  
485 Orphan TSS (oTSS) do not fall into any of the other class definitions.

486

487 **Motif discovery and analysis.** Basal promoter motifs were identified by analyzing 50 bp  
488 upstream of all TSS by the MEME software suite (7). The output from multiple MEME runs  
489 from varying parameter settings were pooled via a custom R script (available upon request) to  
490 obtain estimates for the number of TSS associated with each motif. Promoter regions for  
491 orthologs of genes that are strongly regulated by sulfide in *Cba. tepidum* were extracted from all  
492 *Chlorobiaceae* genomes (Table S4). Up to 1000 bp upstream of the start codon for each  
493 orthologous gene set were analyzed by MEME and/or DMINDA (7, 35). Motifs identified as

494 above were searched against the *Cba. tepidum* genome using FIMO to identify additional  
495 occurrences (15).

496

497 **Deletion mutagenesis.** CT1277 was deleted from the *Cba. tepidum* genome using a counter-  
498 selectable suicide vector that will be fully described elsewhere (Hilzinger and Hanson,  
499 Unpublished). Briefly, a PCR product containing flanking DNA upstream and downstream of  
500 CT1277 was cloned into a mobilizable suicide vector with both antibiotic resistance and a  
501 counter-selectable marker based on a vector used for gene deletions in *Shewanella oneidensis*  
502 MR-1 (36). Primers used in this study are listed in Table S5.

503

504 **Response to sulfide qRT-PCR.** *Cba. tepidum* wild-type and  $\Delta$ CT1277 strains were grown in Pf-  
505 7 medium at 47°C and 20  $\mu\text{mol photon m}^{-2} \text{s}^{-1}$  PAR. The absence of sulfide from cultures was  
506 verified by testing with  $\text{CuCl}_2$  (2). Pre-sulfide biomass was pelleted by centrifugation, flash  
507 frozen in liquid nitrogen, and stored at -70°C. Sulfide was added to a final concentration of 2  
508 mM and cultures were incubated at 47°C and 20  $\mu\text{mol photon m}^{-2} \text{s}^{-1}$  PAR for 40 min. Post-  
509 sulfide biomass was pelleted, flash frozen, and stored at -70°C. RNA was extracted, and purged  
510 of residual genomic DNA as described for dRNA-seq. *sigA* and CT1087 mRNAs were reverse  
511 transcribed into cDNA using the SigA-R-RT (24) and CT1087-R-RT primers (Table S5), and  
512 ProtoScript II cDNA synthesis kit (NEB) in the same reaction mixture. Negative controls lacking  
513 reverse transcriptase were performed to detect the presence of gDNA. The expression levels of  
514 *sigA* and CT1087 were determined using RealMasterMix SYBR ROX (5 Prime) on the ABI  
515 7500 Fast Real-Time PCR System (Applied Biosystems). Genomic DNA standards were used to

516 determine the efficiency of the SigA-RT and CT1087-RT primer sets and to quantify transcript  
517 abundance. CT1087 levels were normalized using *sigA* expression levels.

518

519 **Data deposition.** Data described in this paper have been deposited in the National Center for  
520 Biotechnology Information Short Read Archive affiliated with BioSample accession numbers  
521 SAMN07413950 for S(0) and thiosulfate RNA-seq data and SAMN07413841 for all dRNA-seq  
522 data.

523

#### 524 **Acknowledgements**

525 This work was supported by NSF grant MCB-1244373 to T.E.H. and an IGERT SBE2  
526 fellowship to J.M.H. This project utilized computational resources at the University of Delaware  
527 Center for Bioinformatics and Computational Biology Core Facility funded by Delaware INBRE  
528 (NIGMS GM103446), Delaware EPSCoR (NSF EPS-0814251, NSF IIA-1330446), the State of  
529 Delaware, and the Delaware Biotechnology Institute. The authors would like to thank Katie  
530 Kalis and Amalie Levy for helpful discussions during data analysis and manuscript preparation,  
531 and the University of Delaware Sequencing and Genotyping Center staff for advice and help  
532 with library construction and sequencing.



533 **References**

- 534 1. **Chan LK, Weber TS, Morgan-Kiss RM, Hanson TE.** 2008. A genomic region required  
535 for phototrophic thiosulfate oxidation in the green sulfur bacterium *Chlorobium tepidum*  
536 (syn. *Chlorobaculum tepidum*). *Microbiology* 154:818–829.
- 537 2. **Hanson TE, Bonsu E, Tuerk A, Marnocha CL, Powell DH, Chan CS.** 2015.  
538 *Chlorobaculum tepidum* growth on biogenic S(0) as the sole photosynthetic electron  
539 donor. *Environ Microbiol* 18:2856–2867.
- 540 3. **Marnocha CL, Levy AT, Powell DH, Hanson TE, Chan CS.** 2016. Mechanisms of  
541 extracellular S<sub>0</sub> globule production and degradation in *Chlorobaculum tepidum* via  
542 dynamic cell–globule interactions. *Microbiology* 162:1125–1134.
- 543 4. **Eisen J a, Nelson KE, Paulsen IT, Heidelberg JF, Wu M, Dodson RJ, Deboy R,**  
544 **Gwinn ML, Nelson WC, Haft DH, Hickey EK, Peterson JD, Durkin a S, Kolonay**  
545 **JL, Yang F, Holt I, Umayam L a, Mason T, Brenner M, Shea TP, Parksey D,**  
546 **Nierman WC, Feldblyum T V, Hansen CL, Craven MB, Radune D, Vamathevan J,**  
547 **Khoury H, White O, Gruber TM, Ketchum K a, Venter JC, Tettelin H, Bryant D a,**  
548 **Fraser CM.** 2002. The complete genome sequence of *Chlorobium tepidum* TLS, a  
549 photosynthetic, anaerobic, green-sulfur bacterium. *Proc Natl Acad Sci U S A* 99:9509–  
550 9514.
- 551 5. **Eddie BJ, Hanson TE.** 2013. *Chlorobaculum tepidum* TLS displays a complex  
552 transcriptional response to sulfide addition. *J Bacteriol* 195:399–408.
- 553 6. **Gruber TM, Bryant DA.** 1998. Characterization of the group 1 and group 2 sigma  
554 factors of the green sulfur bacterium *Chlorobium tepidum* and the green non-sulfur  
555 bacterium *Chloroflexus aurantiacus*. *Arch Microbiol* 170:285–296.

- 556 7. **Bailey TL, Williams N, Mischel C, Li WW.** 2006. MEME: Discovering and analyzing  
557 DNA and protein sequence motifs. *Nucleic Acids Res* 34:369–373.
- 558 8. **Chen S, Bagdasarian M, Kaufman MG, Bates AK, Walker ED.** 2007. Mutational  
559 analysis of the *ompA* promoter from *Flavobacterium johnsoniae*. *J Bacteriol* 189:5108–  
560 5118.
- 561 9. **Vingadassalom D, Kolb A, Mayer C, Rybkine T, Collatz E, Podglajen I.** 2005. An  
562 unusual primary sigma factor in the Bacteroidetes phylum. *Mol Microbiol* 56:888–902.
- 563 10. **Helmann JD.** 2002. The Extracytoplasmic Function (ECF) Sigma Factors, p. 47–110. *In*  
564 *Advances in Microbial Physiology*.
- 565 11. **Manganelli R, Voskuil MI, Schoolnik GK, Smith I.** 2001. The *Mycobacterium*  
566 *tuberculosis* ECF sigma factor  $\sigma^E$ : role in global gene expression and survival in  
567 macrophages. *Mol Microbiol* 41:423–437.
- 568 12. **Manganelli R, Voskuil MI, Schoolnik GK, Dubnau E, Gomez M, Smith I.** 2002. Role  
569 of the extracytoplasmic-function  $\sigma$  Factor  $\sigma^H$  in *Mycobacterium tuberculosis* global gene  
570 expression. *Mol Microbiol* 45:365–374.
- 571 13. **Paget MSB, Molle V, Cohen G, Aharonowitz Y, Buttner MJ.** 2001. Defining the  
572 disulphide stress response in *Streptomyces coelicolor* A3(2): identification of the  $\sigma^R$   
573 regulon. *Mol Microbiol* 42:1007–1020.
- 574 14. **Qiu J, Helmann JD.** 2001. The -10 Region Is a Key Promoter Specificity Determinant  
575 for the *Bacillus subtilis* Extracytoplasmic-Function  $\sigma$  Factors  $\sigma^X$  and  $\sigma^W$ . *J Bacteriol*  
576 183:1921–1927.
- 577 15. **Grant CE, Bailey TL, Noble WS.** 2011. FIMO: Scanning for occurrences of a given  
578 motif. *Bioinformatics* 27:1017–1018.

- 579 16. **Weinitschke S, Denger K, Cook AM, Smits THM.** 2007. The DUF81 protein TauE in  
580 *Cupriavidus necator* H16, a sulfite exporter in the metabolism of C<sub>2</sub> sulfonates.  
581 Microbiology 153:3055–3060.
- 582 17. **Gupta S, Stamatoyannopoulos JA, Bailey TL, Noble WS.** 2007. Quantifying similarity  
583 between motifs. Genome Biol 8:R24.
- 584 18. **Gregersen LH, Bryant DA, Frigaard N.** 2011. Mechanisms and evolution of oxidative  
585 sulfur metabolism in green sulfur bacteria. Front Microbiol 2:1–14.
- 586 19. **Forte E, Borisov VB, Falabella M, Colaço HG, Tinajero-Trejo M, Poole RK, Vicente  
587 JB, Sarti P, Giuffrè A.** 2016. The Terminal Oxidase Cytochrome *bd* Promotes Sulfide-  
588 resistant Bacterial Respiration and Growth. Sci Rep 6:23788.
- 589 20. **Nawrocki EP, Burge SW, Bateman A, Daub J, Eberhardt RY, Eddy SR, Floden EW,  
590 Gardner PP, Jones TA, Tate J, Finn RD.** 2015. Rfam 12.0: Updates to the RNA  
591 families database. Nucleic Acids Res 43:D130–D137.
- 592 21. **Kolb A, Busby S, Buc H, Garges S, Adhya S.** 1993. Transcriptional regulation by cAMP  
593 and its receptors. Annu Rev Biochem 62:749–795.
- 594 22. **Spiro S.** 1994. The FNR family of transcriptional regulators. Antonie Van Leeuwenhoek  
595 66:23–36.
- 596 23. **Novichkov PS, Kazakov AE, Ravcheev DA, Leyn SA, Kovaleva GY, Sutormin RA,  
597 Kazanov MD, Riehl W, Arkin AP, Dubchak I, Rodionov DA.** 2013. RegPrecise 3.0--a  
598 resource for genome-scale exploration of transcriptional regulation in bacteria. BMC  
599 Genomics 14:745.
- 600 24. **Chan LK, Morgan-Kiss RM, Hanson TE.** 2009. Functional analysis of three  
601 sulfide:quinone oxidoreductase homologs in *Chlorobaculum tepidum*. J Bacteriol

- 602 191:1026–1034.
- 603 25. **Reitzer LJ, Movsas B, Magasanik B.** 1989. Activation of *glnA* transcription by nitrogen  
604 regulator I (NRI)-phosphate in *Escherichia coli*: Evidence for a long-range physical  
605 interaction between NR1-phosphate and RNA polymerase. *J Bacteriol* 171:5512–5522.
- 606 26. **Wösten M.** 1998. Eubacterial sigma-factors. *FEMS Microbiol Rev* 22:127–50.
- 607 27. **Thomason MK, Bischler T, Eisenbart SK, Förstner KU, Zhang A, Herbig A, Nieselt  
608 K, Sharma CM, Storz G.** 2015. Global transcriptional start site mapping using  
609 differential RNA sequencing reveals novel antisense RNAs in *Escherichia coli*. *J  
610 Bacteriol* 197:18–28.
- 611 28. **Dugar G, Herbig A, Förstner KU, Heidrich N, Reinhardt R, Nieselt K, Sharma CM.**  
612 2013. High-Resolution Transcriptome Maps Reveal Strain-Specific Regulatory Features  
613 of Multiple *Campylobacter jejuni* Isolates. *PLoS Genet* 9:e1003495.
- 614 29. **Nunn WD, Simons RW.** 1978. Transport of long-chain fatty acids by *Escherichia coli*:  
615 mapping and characterization of mutants in the *fadL* gene. *Proc Natl Acad Sci* 75:3377–  
616 3381.
- 617 30. **Anders S, Huber W.** 2010. Differential expression analysis for sequence count data.  
618 *Genome Biol* 11:R106.
- 619 31. **Levy AT, Lee KH, Hanson TE.** 2016. *Chlorobaculum tepidum* modulates amino acid  
620 composition in response to energy availability, as revealed by a systematic exploration of  
621 the energy landscape of phototrophic sulfur oxidation. *Appl Environ Microbiol* 82:6431–  
622 6439.
- 623 32. **Sharma CM, Hoffmann S, Darfeuille F, Reignier J, Findeiss S, Sittka A, Chabas S,  
624 Reiche K, Hackermüller J, Reinhardt R, Stadler PF, Vogel J.** 2010. The primary

- 625 transcriptome of the major human pathogen *Helicobacter pylori*. Nature 464:250–255.
- 626 33. **Förstner KU, Vogel J, Sharma CM, Sharma CM, Konrad UF.** 2014. READemption -  
627 A tool for the computational analysis of deep-sequencing-based transcriptome data.  
628 Bioinformatics btu533.
- 629 34. **Ma Q, Zhang H, Mao X, Zhou C, Liu B, Chen X, Xu Y.** 2014. DMINDA□: an  
630 integrated web server for DNA motif identification and analyses. Nucleic Acids Res  
631 42:12–19.
- 632 35. **Burns JL, DiChristina TJ.** 2009. Anaerobic respiration of elemental sulfur and  
633 thiosulfate by *Shewanella oneidensis* MR-1 requires *psrA*, a homolog of the *phsA* gene of  
634 *Salmonella enterica serovar typhimurium* LT2. Appl Environ Microbiol 75:5209–5217.  
635

636 **Legends for Supplementary Material**

637 **Table S1.** Differential gene expression analysis for RNA-seq data in Excel format (.xlsx). Sheet  
638 1 (S0 vs. TS) contains DESeq output comparing RNA-seq libraries prepared from cells grown on  
639 S(0) (baseMeanA) vs. thiosulfate (baseMeanB) as the electron donor. Sheet 2 contains the  
640 analysis of expression ratios on different electron donors vs. thiosulfate (i.e. sulfide vs.  
641 thiosulfate compared to S(0) vs. thiosulfate) to identify genes differentially expression between  
642 S(0) and sulfide. See Materials and Methods for details of calculations.

643

644 **Table S2.** Summary alignment statistics for each dRNA-seq library produced in this study.

645

646 **Table S3.** All TSS identified in this study and their classification.

647

648 **Table S4.** *Chlorobiaceae* genome annotations used in the phylogenetic footprinting analysis.

649

650 **Table S5.** Sequences for oligonucleotide primers used in this study.

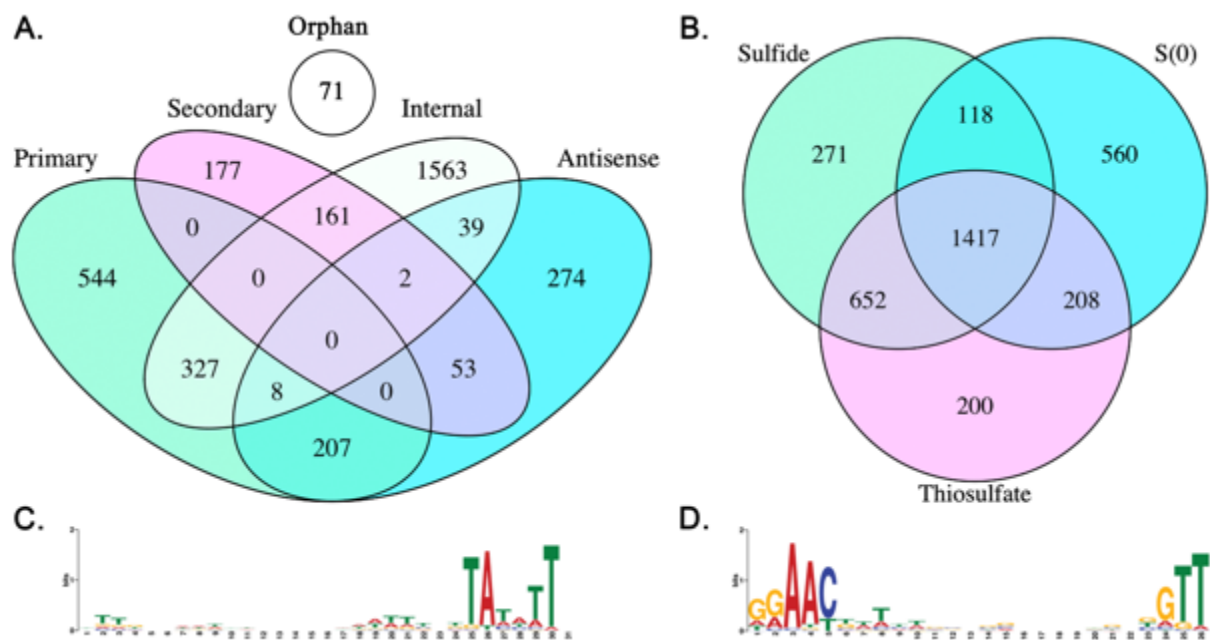

**Figure 1.** Venn diagrams for TSS data organized by TSS classification (A), or by growth condition (B). Core promoter motifs identified from analyzing 50 bp upstream of all TSS: motif RpoD motif (C) and an ECF factor-like (D).

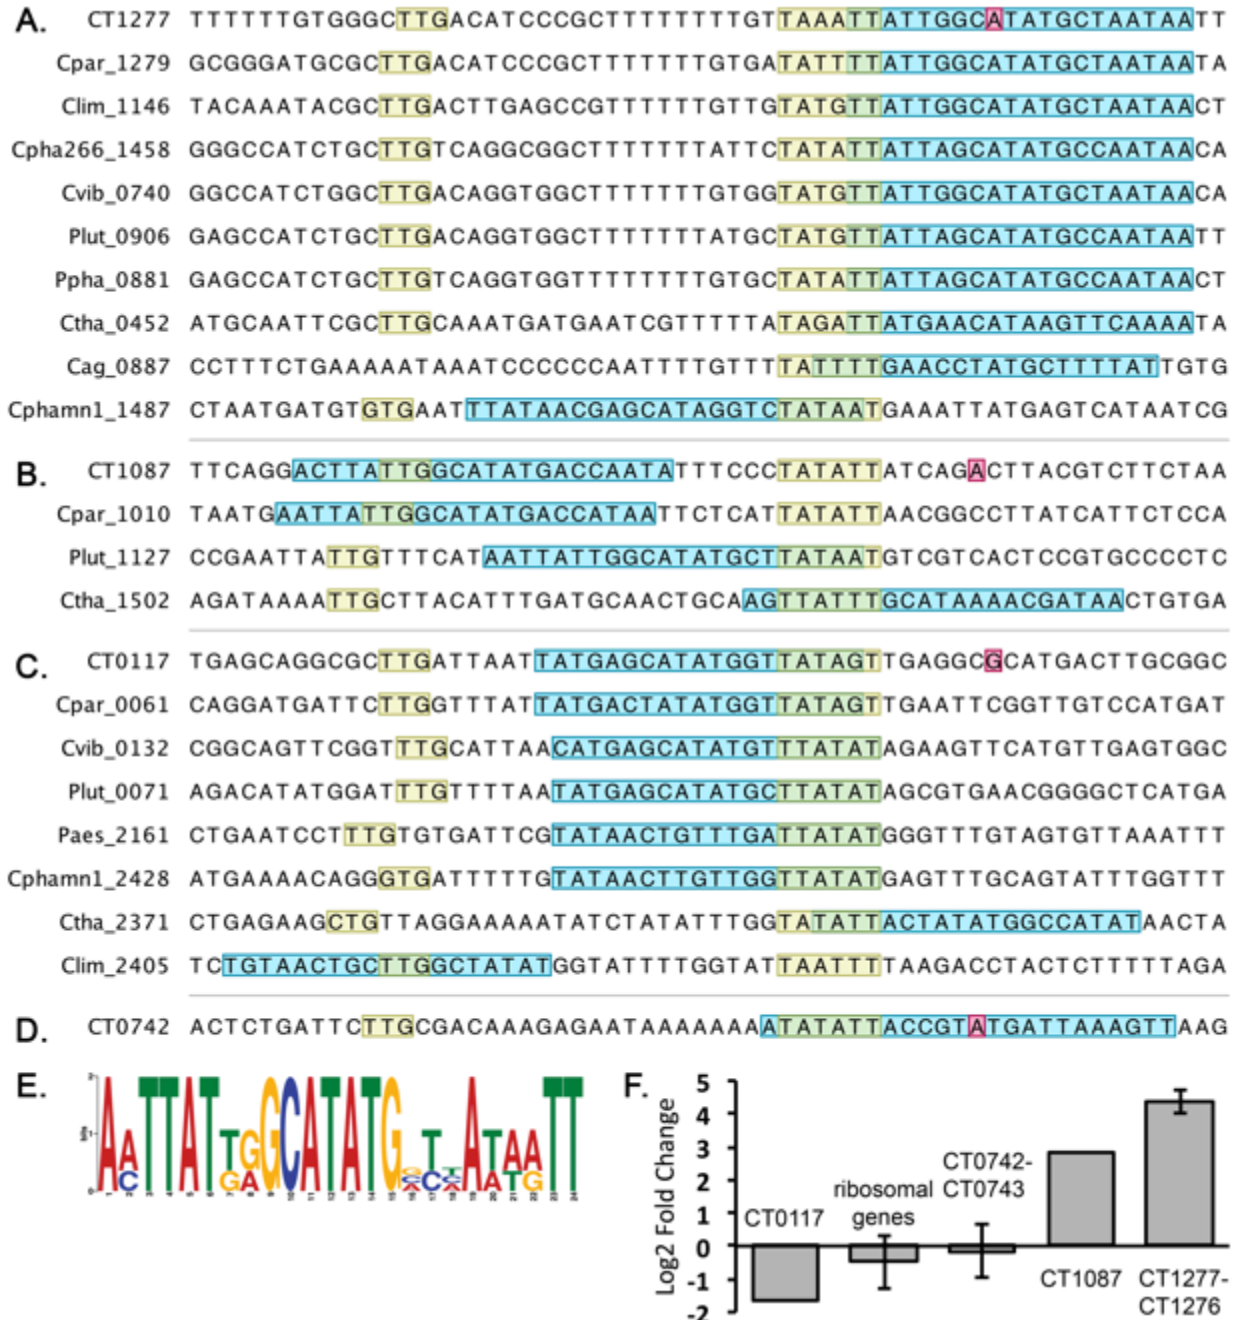

**Figure 2.** Identification of putative sulfide operator sequence 1 (PSOS-1). Promoter regions for orthologs of CT1277 (**A**) CT1087 (**B**) and CT0117 (**C**) were extracted from all *Chlorobiaceae* genomes. RpoD (yellow) and PSOS-1 (blue) motifs were discovered by promoter analysis. TSS mapped in *Cba. tepidum* are shown in pink. The *Cba. tepidum* consensus motif was searched against the *Cba. tepidum* genome, which returned an additional TSS associated with PSOS-1 (**D**). The PSOS-1 consensus motif for the three *Cba. tepidum* sites (**E**). Log<sub>2</sub> fold change in transcript abundance on sulfide relative to S(0) of genes associated with PSOS-1 with ribosomal protein genes as a comparator as described in Eddie and Hanson (5) (**F**).



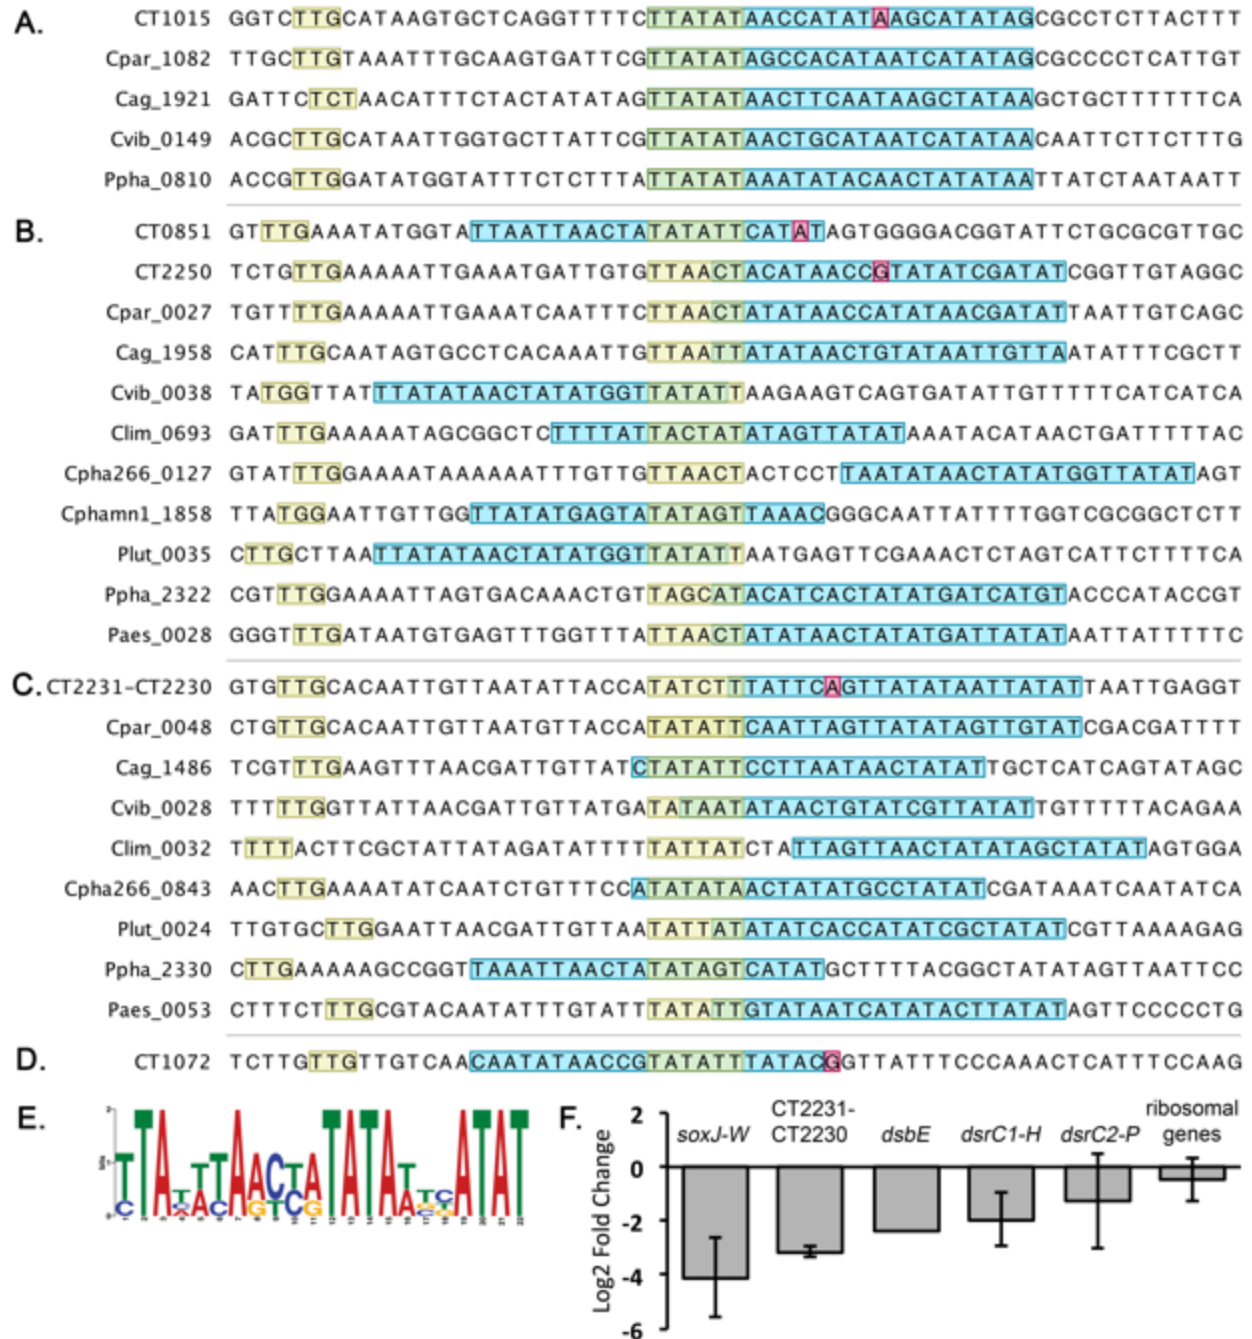

**Figure 3.** Identification of putative sulfide operator sequence 2 (PSOS-2). Promoter regions for orthologs of the *sox* operon (A) *dsrC* (B) and CT2230 (C) were extracted from all *Chlorobiaceae* genomes. RpoD (yellow) and PSOS-2 (blue) motifs were discovered by promoter analysis. TSS mapped in *Cba. tepidum* are shown in pink. The *Cba. tepidum* consensus motif was searched against the *Cba. tepidum* genome, which returned additional TSS associated with PSOS-2 (D). The PSOS-2 consensus motif for the four *Cba. tepidum* sites (E). Log<sub>2</sub> fold change in transcript abundance on sulfide relative to S(0) of genes associated with PSOS-2 with ribosomal protein genes as a comparator as described in Eddie and Hanson (5) (F).

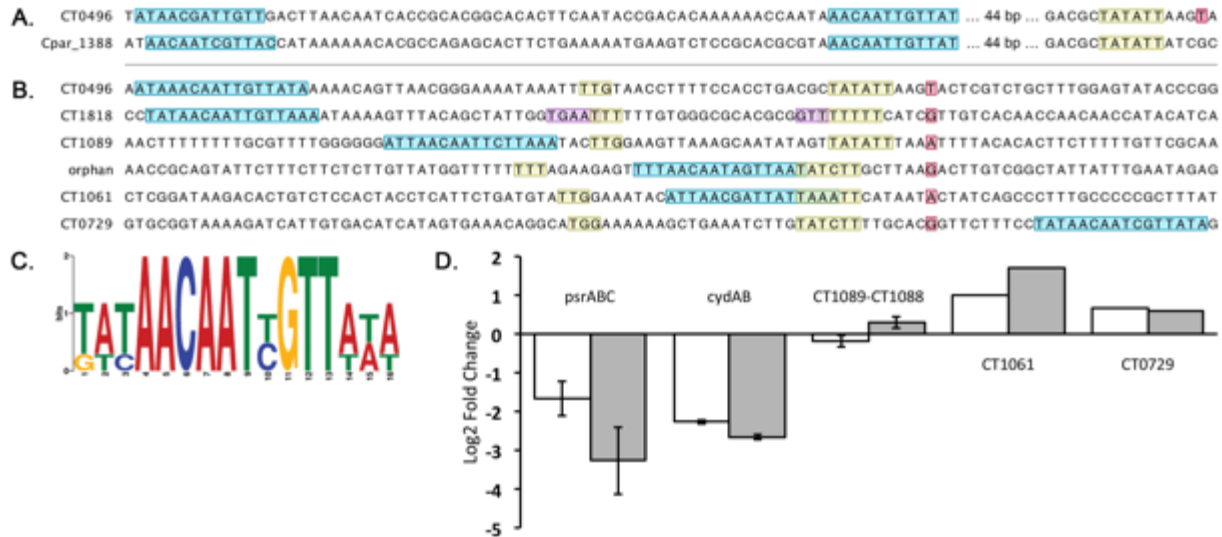

**Figure 4.** Identification of the CRP-like motif (CLM). Promoter regions for orthologs of the *psrABC* operon were extracted from all *Chlorobiaceae* genomes. RpoD (yellow), ECF sigma factor (purple), and CLM (blue) motifs were discovered by promoter analysis (A). TSS mapped in *Cba. tepidum* are shown in pink. The *Cba. tepidum* consensus motif was searched against the *Cba. tepidum* genome, which returned additional TSS associated with CLM (B). Consensus motif derived from *Cba. tepidum* CLM sites (C). Log<sub>2</sub> fold change in transcript abundance of genes associated with CLM; S(0) relative to thiosulfate (white) and sulfide relative to S(0) (gray) (D).

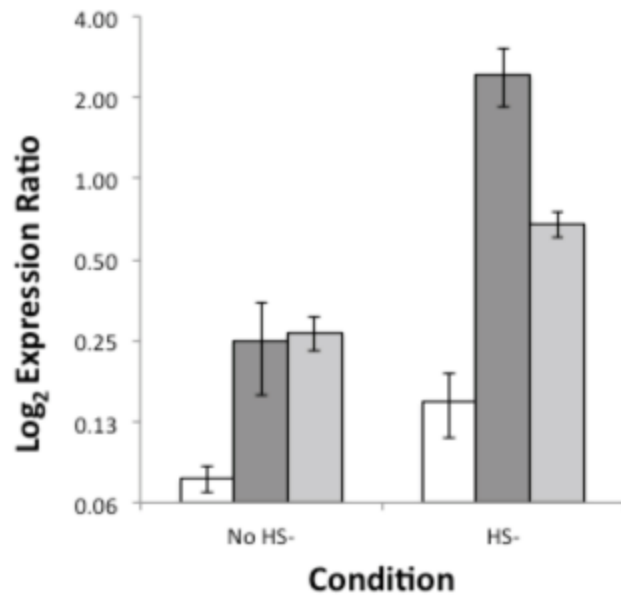

**Figure 5.** CT1277 is a transcriptional repressor of CT1087. Q-RT-PCR of CT1087 in *Cba. tepidum* wild-type (white),  $\Delta$ 1277.6 (dark gray), and  $\Delta$ CT1277.11 (light gray) pre-sulfide addition and 40 min post-sulfide addition. Error bars are equal to one standard deviation.

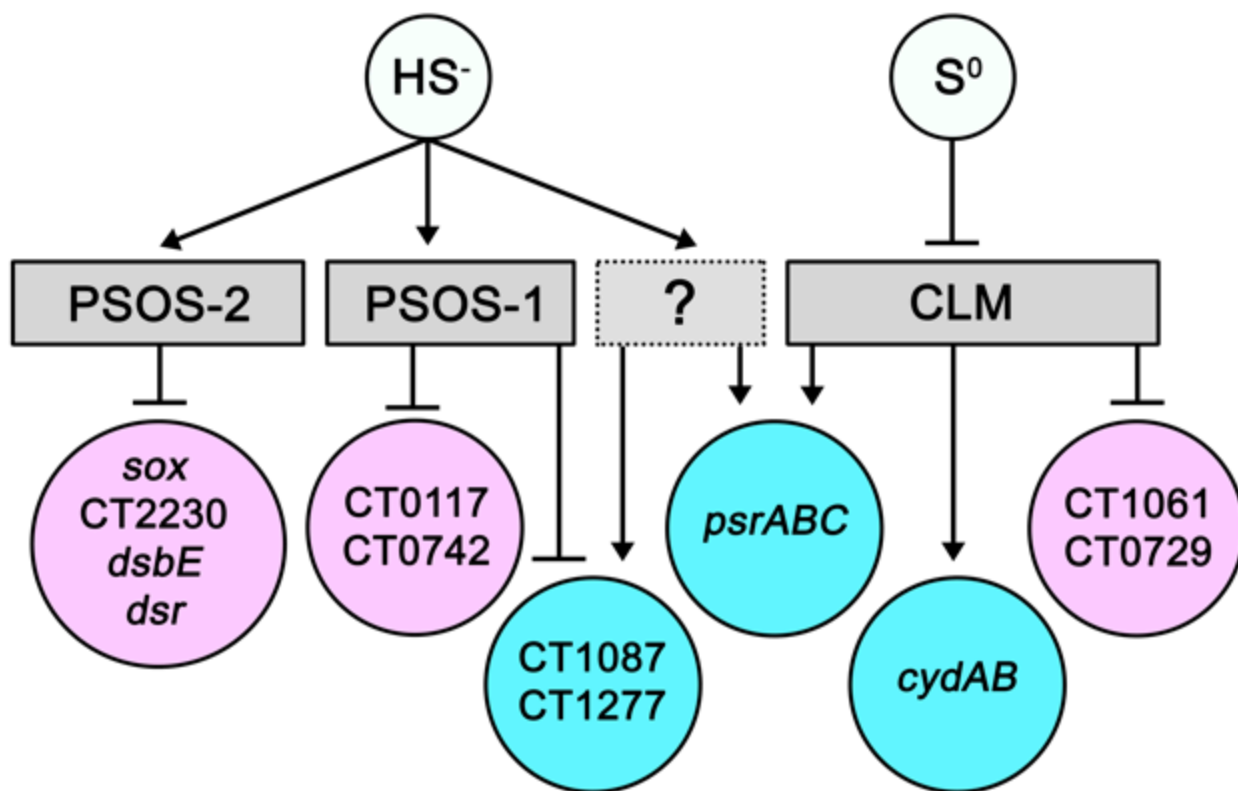

**Figure 6.** Simplified model of the oxidative sulfur metabolism regulatory network in *Cba. tepidum* with nodes representing metabolites (light blue), putative regulatory signals (gray), genes downregulated on sulfide relative to  $\text{S}(0)$  (pink), and genes upregulated on sulfide relative to  $\text{S}(0)$  (blue). Arrows represent activation, and bars represent repression.
